# Supplementary material
Source: Springer Nature journal article supplement (https://www.springermedizin.de/resource/supplementary/12890_2012_427_MOESM8_ESM.pdf/9505196)

ARGINASE

iNOS

NF-kB

PGF2 $\alpha$ 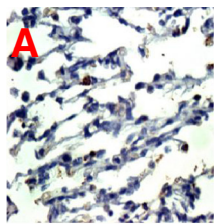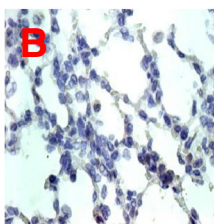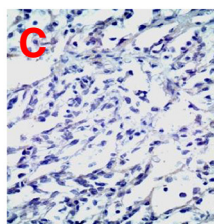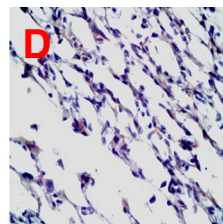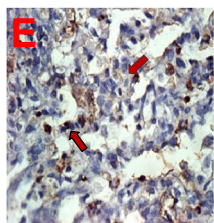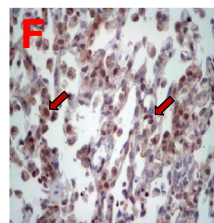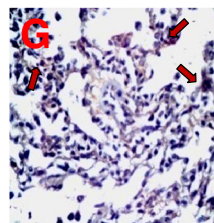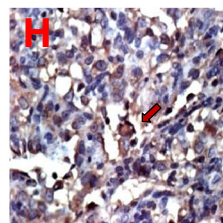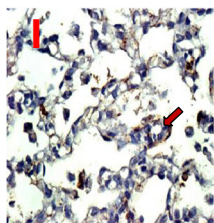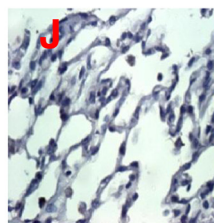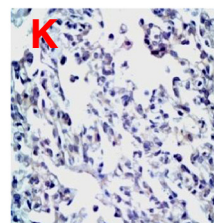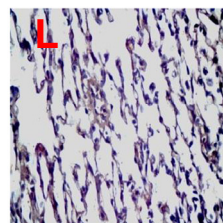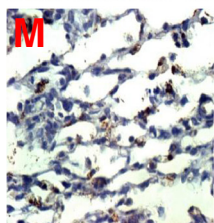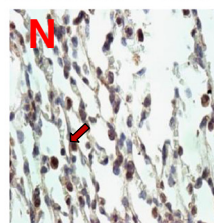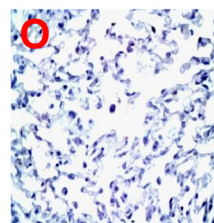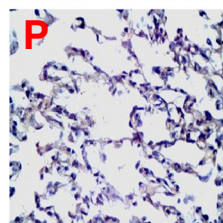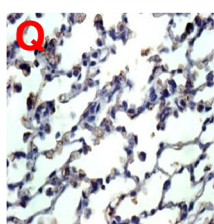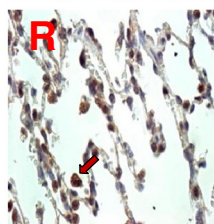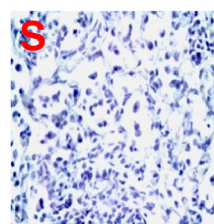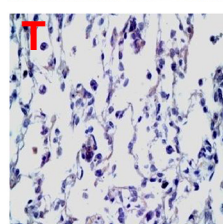

Supplement: MOESM8 [file 9505196]
